# Supplementary figures and images for: Effects of Probiotics on Gut Microbiomes of Extremely Preterm Infants in the Neonatal Intensive Care Unit: A Prospective Cohort Study
Source: MDPI journal article supplement (doi:10.3390/nu14153239), 2022-08-08

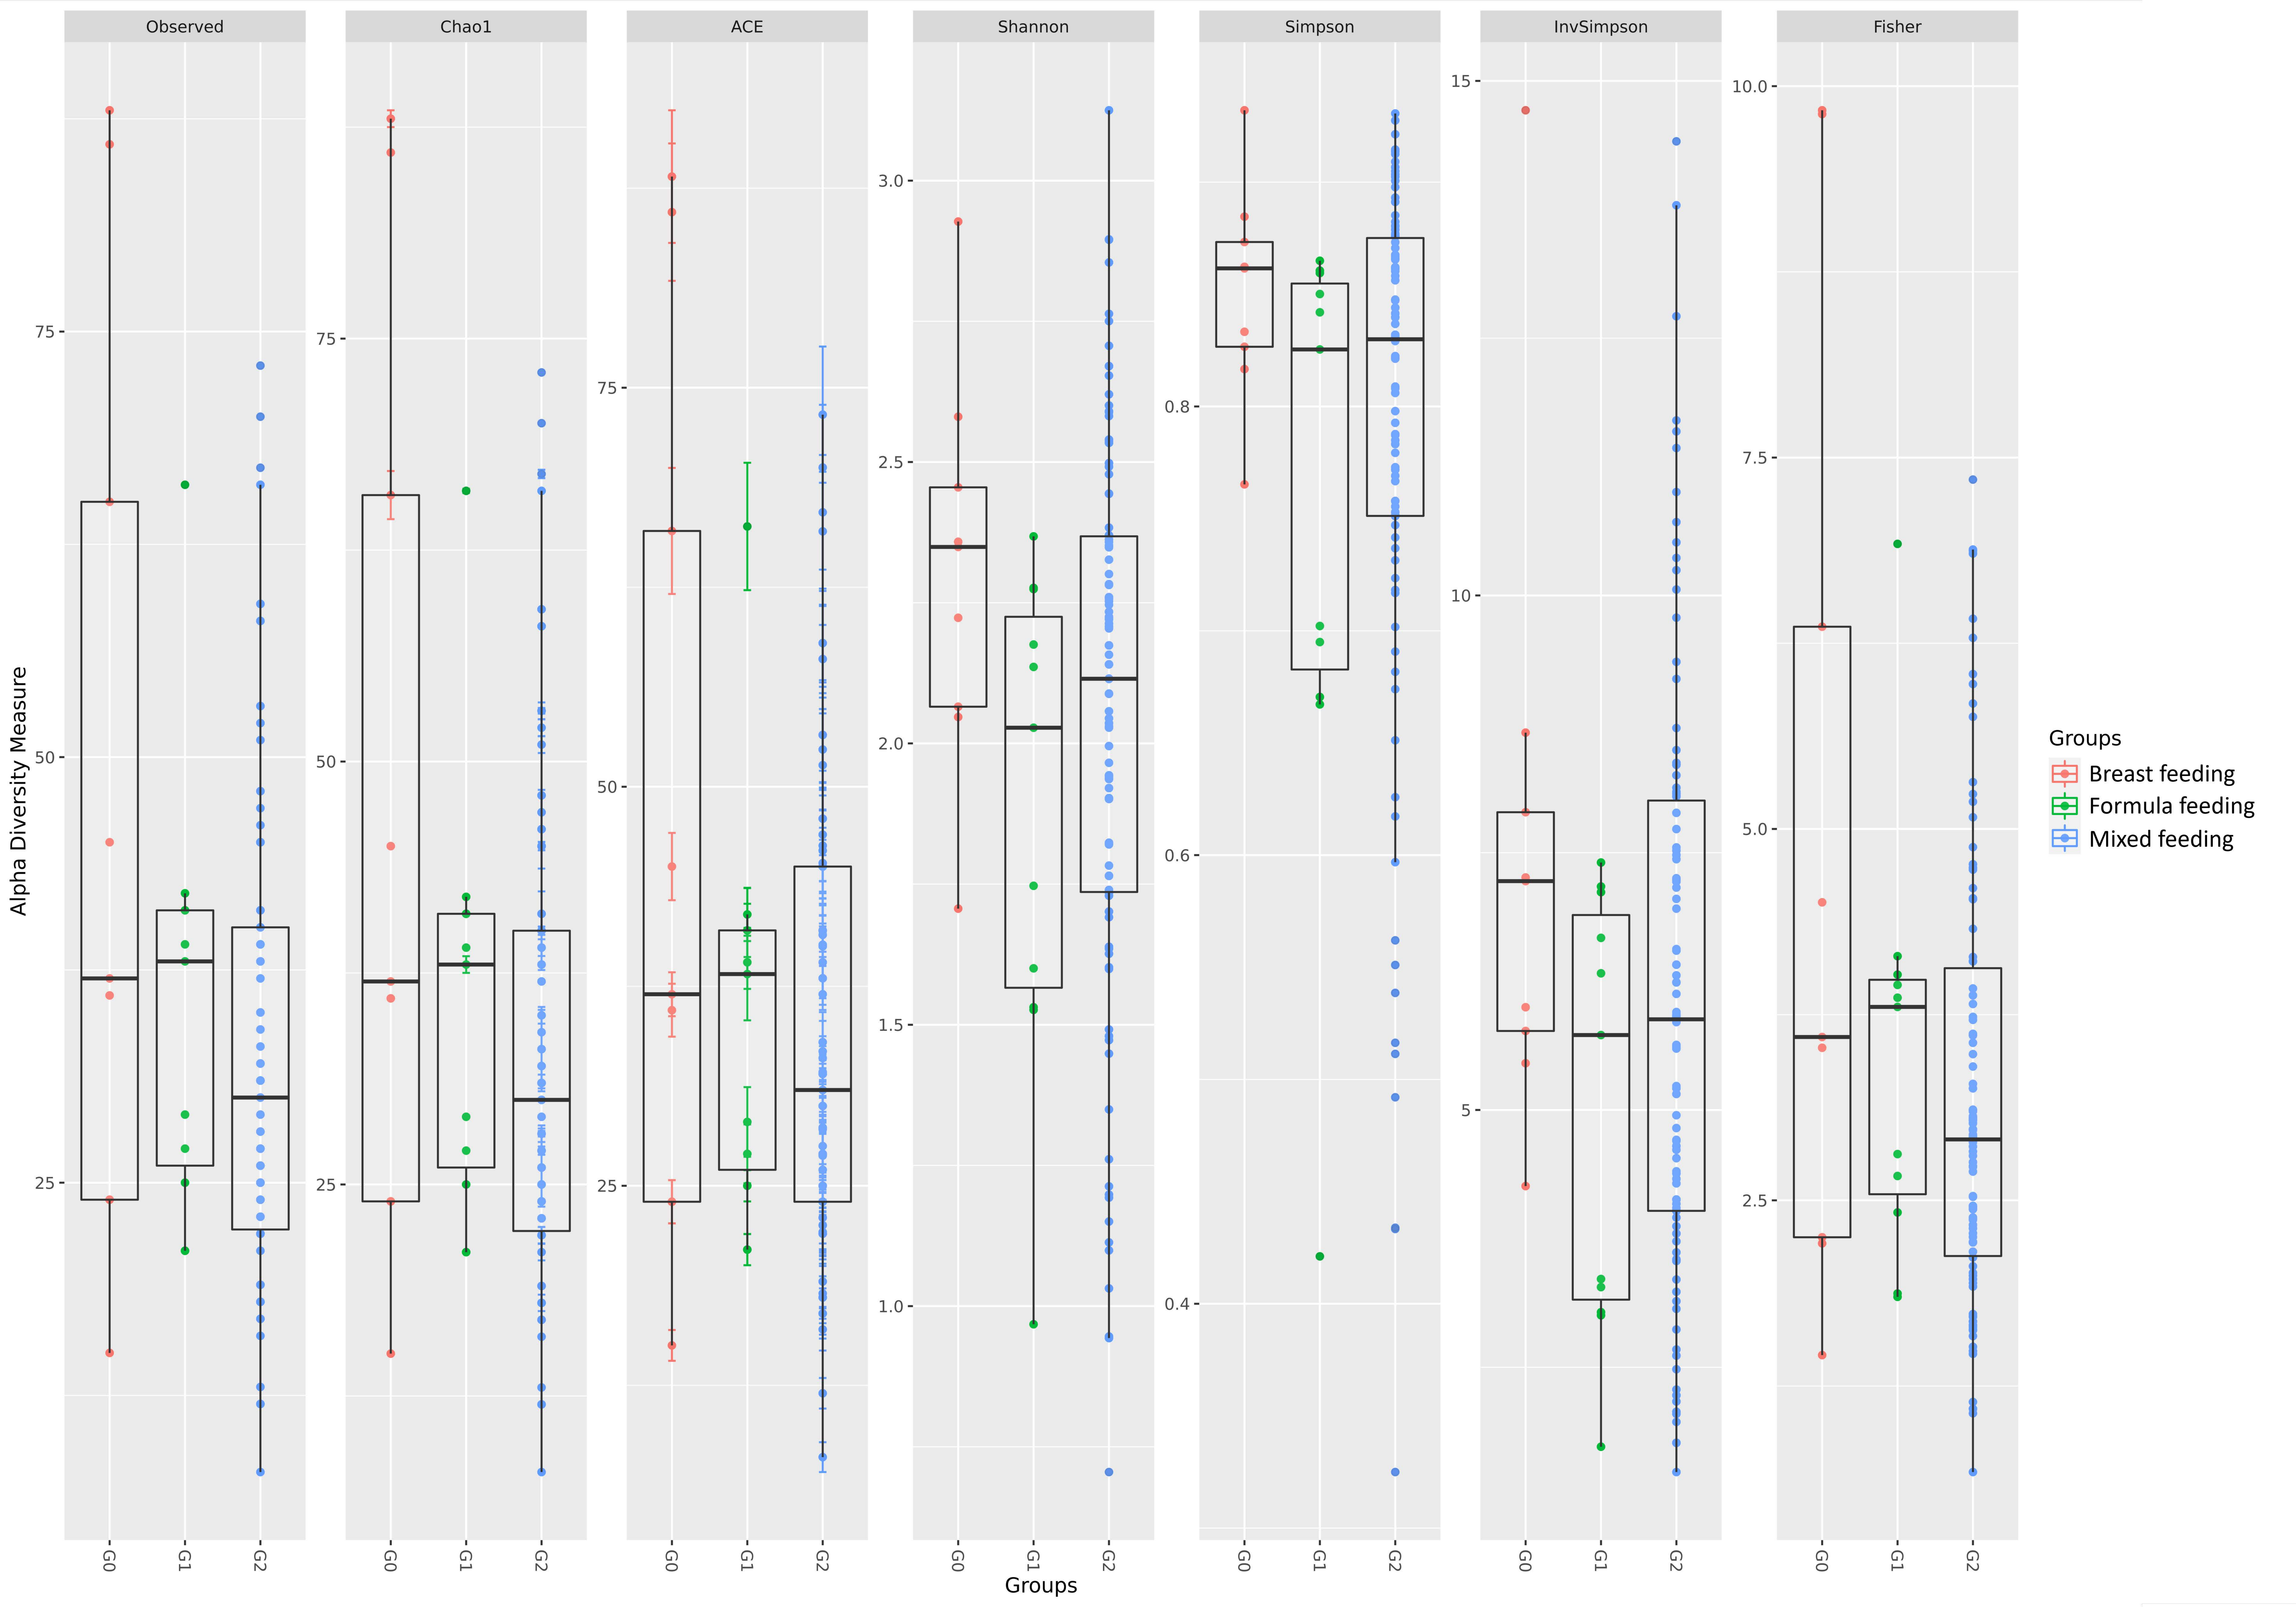

Supplement: s1 [file s1]

**C** PCoA plot (the weighted Unifrac distance): Groups

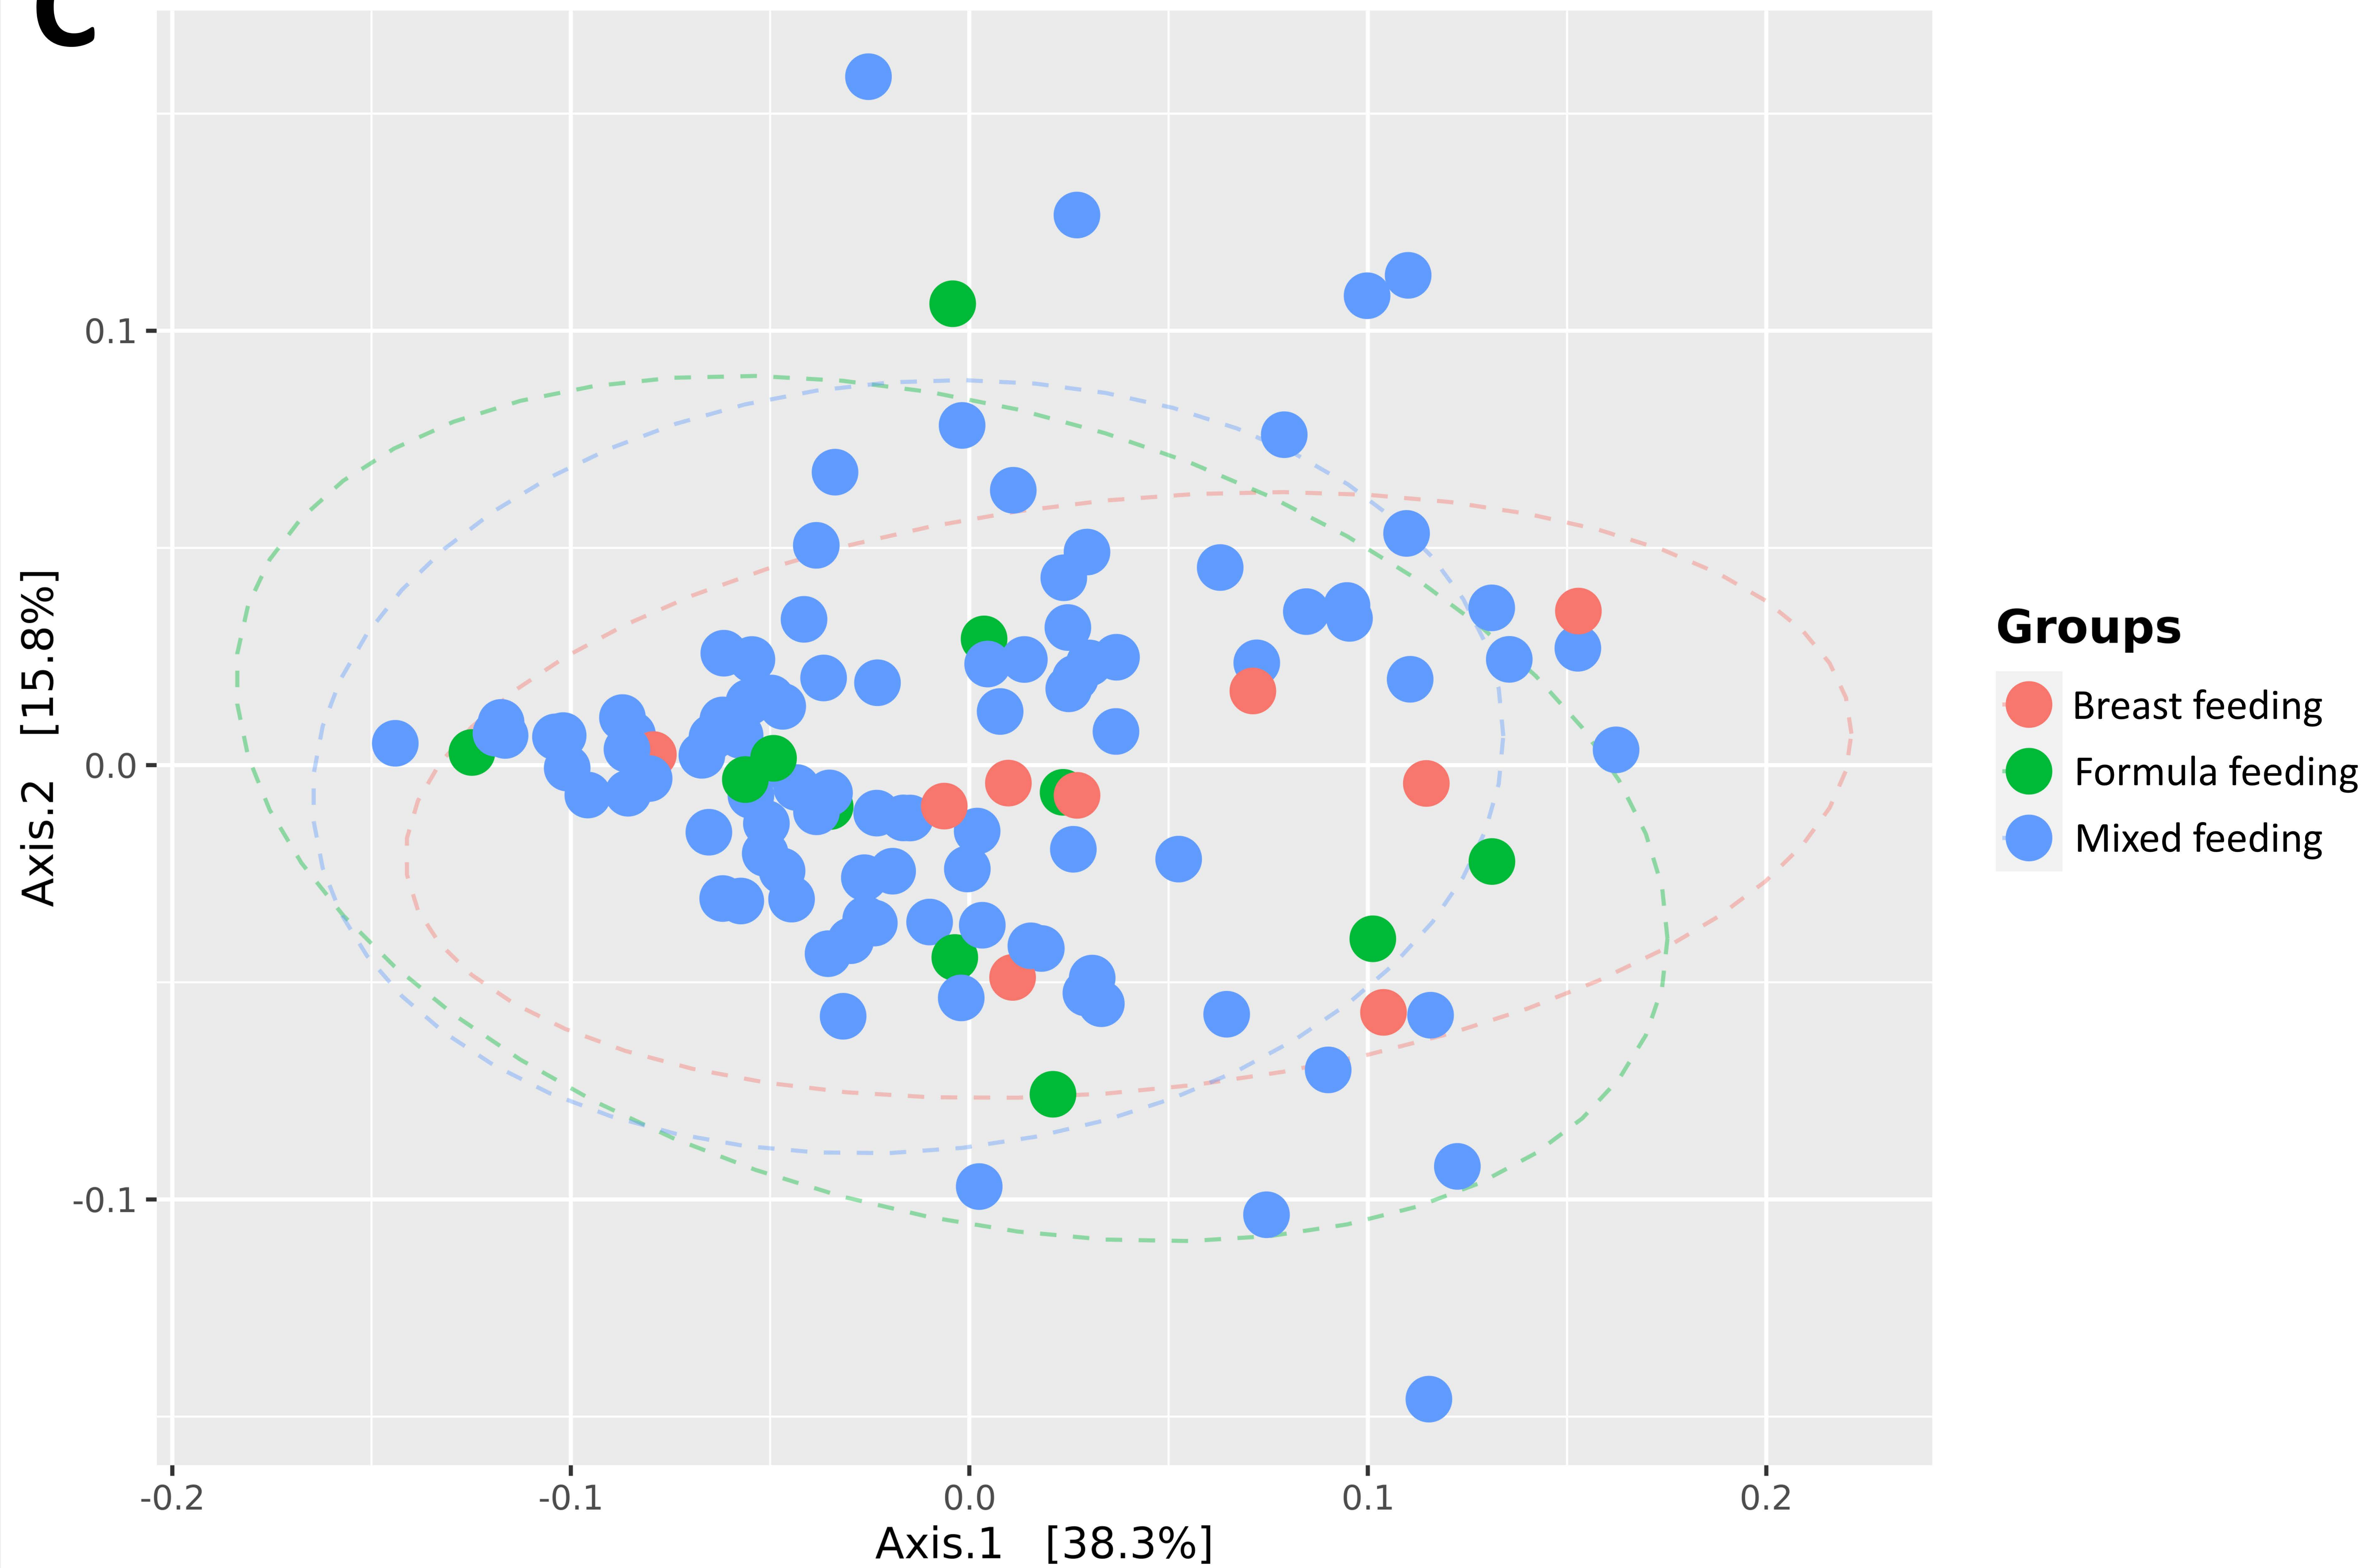

Supplement: s1 [file s1]

**A**

# Bray NMDS: Groups

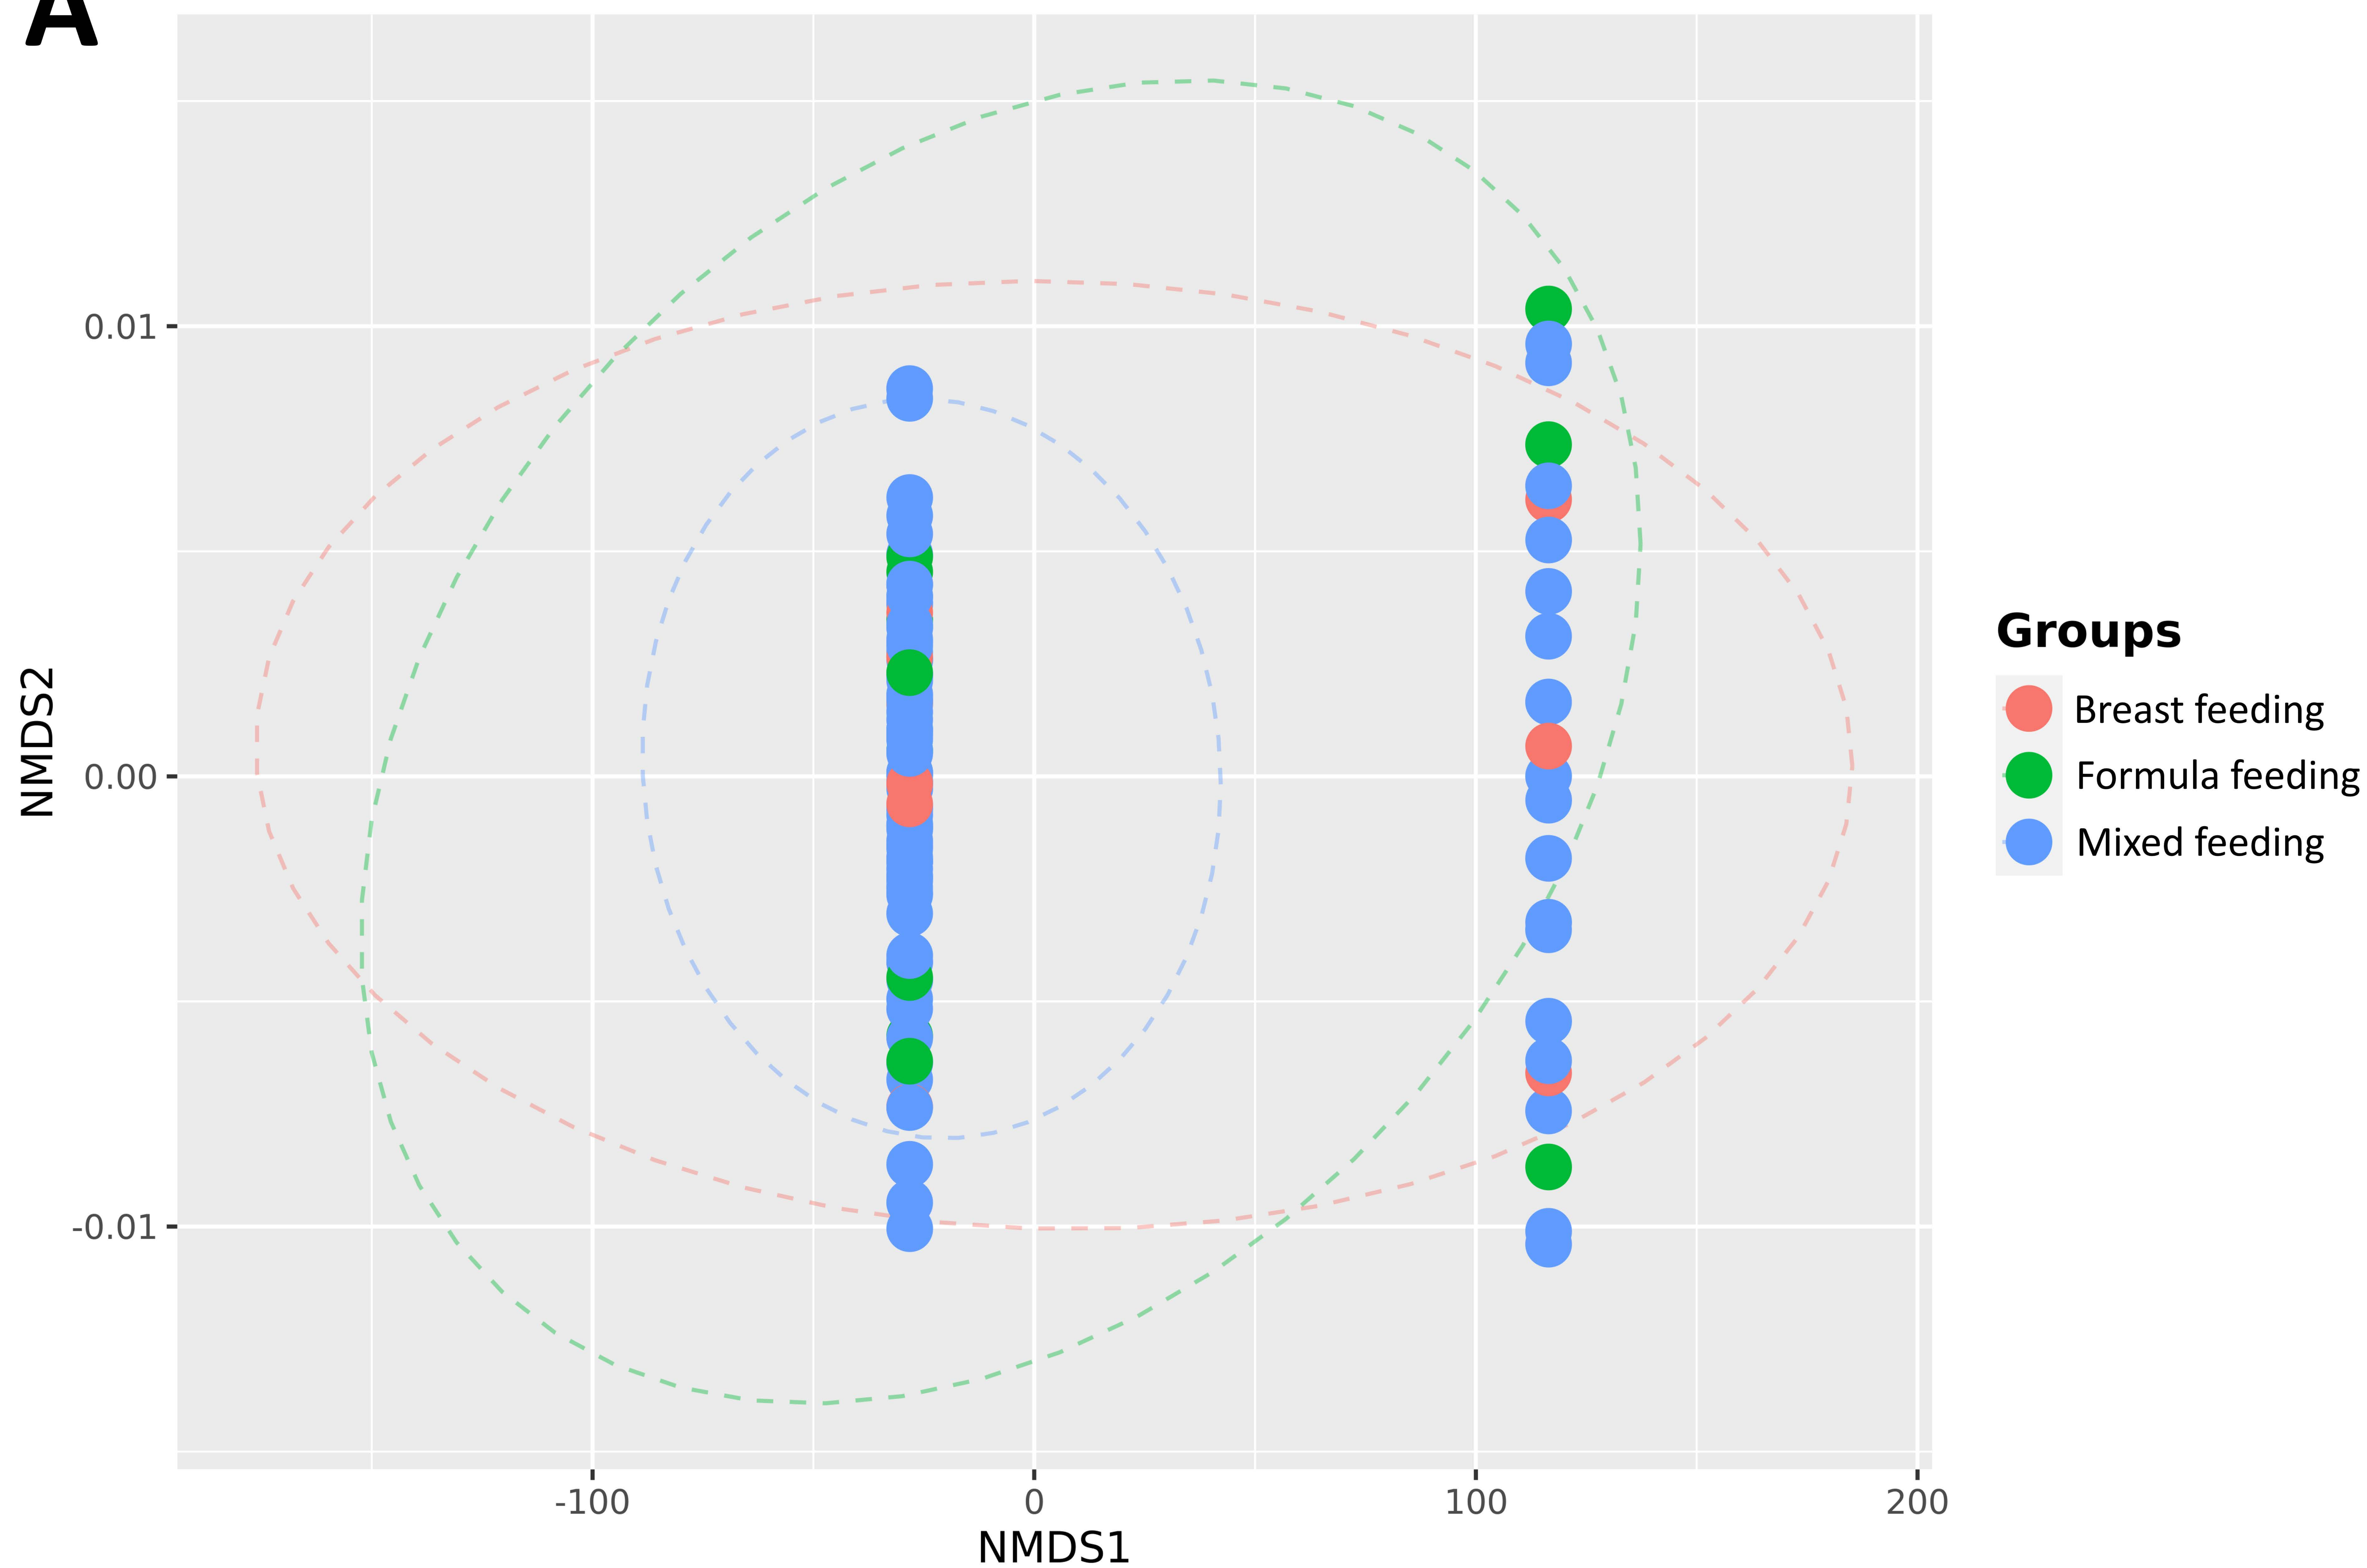

Supplement: s1 [file s1]

**B** PCoA plot (the uweighted Unifrac distance): Groups

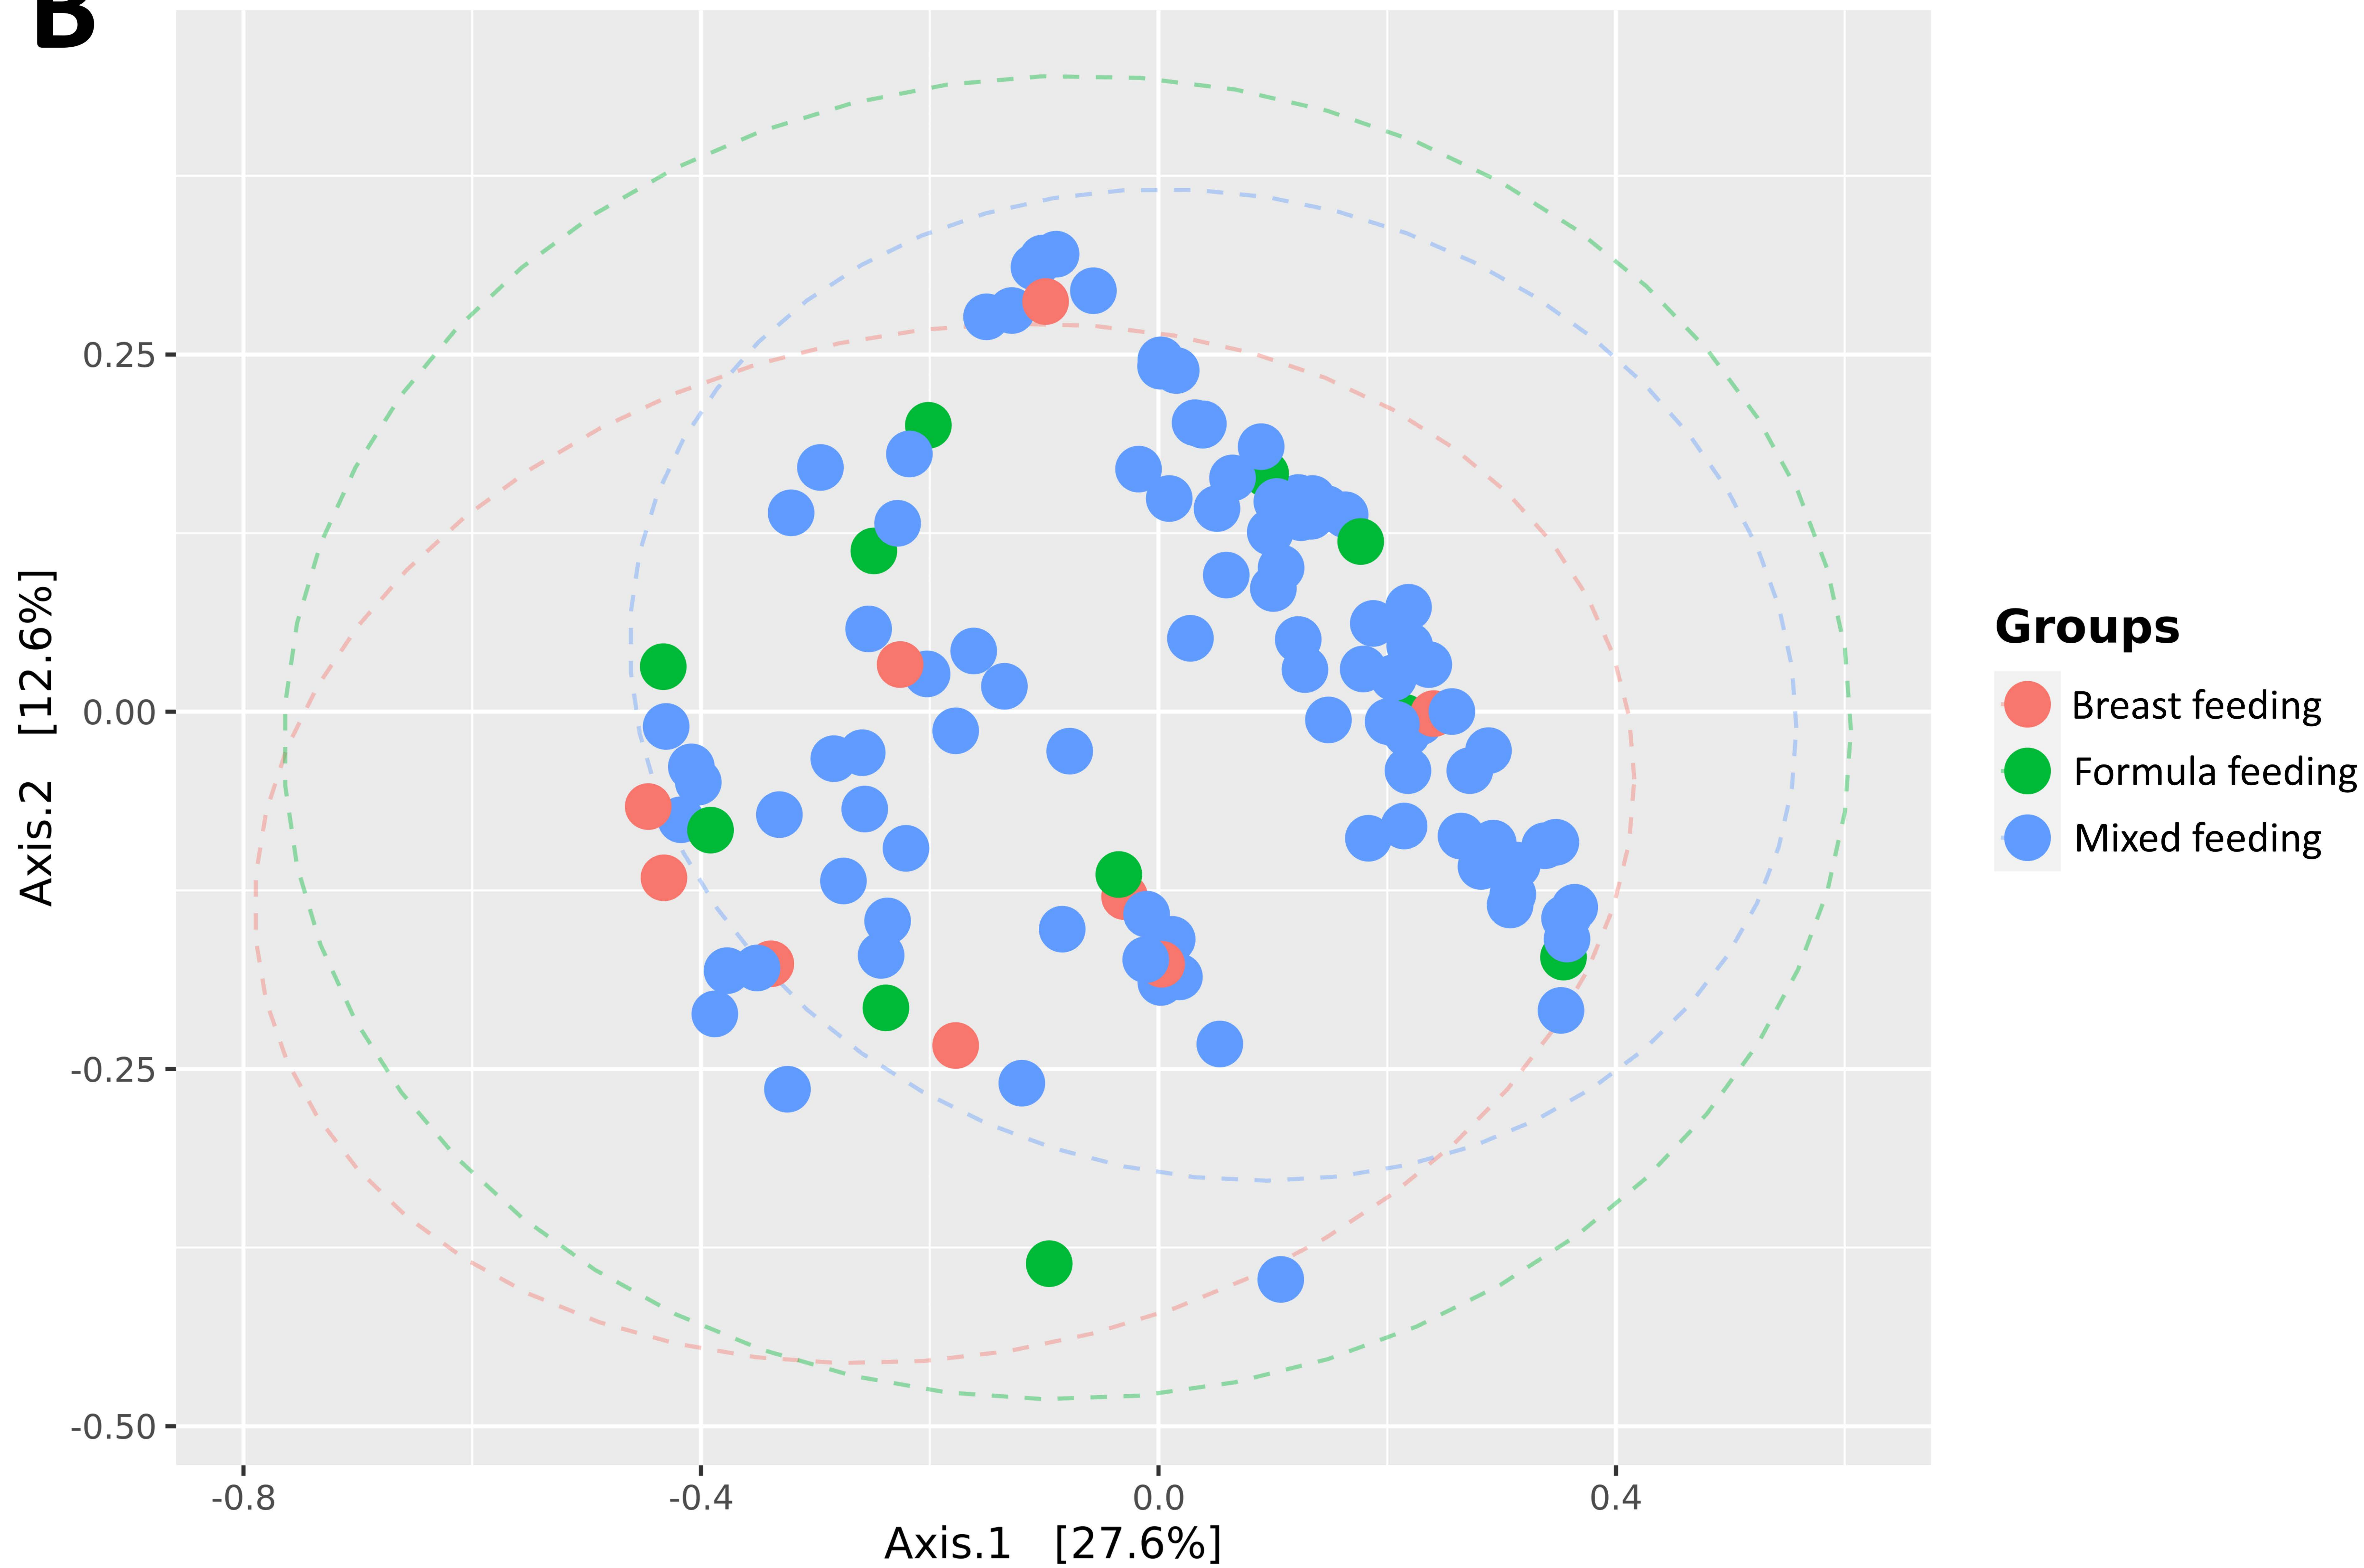

Supplement: s1 [file s1]
